# Supplementary material for: Clostridioides difficile infection induces a rapid influx of bile acids into the gut during colonization of the host
Source: PubMed Central journal article supplement — Cell Rep. Author manuscript; Available in PMC 2021 Sep 16. (PMC8445666; doi:10.1016/j.celrep.2021.109683), 2021-09-07
Supplement: NIHMS1738916-supplement-1.pdf [file NIHMS1738916-supplement-1.pdf]

Cell Reports, Volume 36

**Supplemental information**

***Clostridioides difficile* infection**

**induces a rapid influx of bile acids**

**into the gut during colonization of the host**

**Aaron G. Wexler, Emma R. Guiberson, William N. Beavers, John A. Shupe, M. Kay Washington, D. Borden Lacy, Richard M. Caprioli, Jeffrey M. Spraggins, and Eric P. Skaar**

**Table S1.** Bacterial strains and oligonucleotide primers used in this study.

| <b>Strain or Primer name</b>                 | <b>Note / sequence (5'-3')</b>    | <b>Reference / Source</b> |
|----------------------------------------------|-----------------------------------|---------------------------|
| <b><i>Bacterial species and strains</i></b>  |                                   |                           |
| <i>C. difficile</i> R20291                   | wild-type                         | S. Kuehnes                |
| <i>C. difficile</i> R20291 <i>tcdAB</i> ::CT | <i>tcdA</i> ::CT <i>tcdB</i> ::CT | S. Kuehnes                |
| <b><i>Primers for qRT-PCR</i></b>            |                                   |                           |
| Cyp7A1_qPCR_F                                | TTCTTTGATCTGGGGGATTG              | PMID_23752203             |
| Cyp7A1_qPCR_R                                | ATTTCCCATCAGTTTGCAG               | PMID_23752203             |
| Cyp8b1_qPCR_F                                | ACAAGCAGCAAGACCTGGAT              | PMID_18587407             |
| Cyp8b1_qPCR_R                                | ATGGAAGAGACGCTGCAACT              | PMID_18587407             |
| Baat_qPCR_F                                  | CACCTGATTGAGCCTCCCTA              | This study                |
| Baat_qPCR_R                                  | GGAAGGAGATGCTGCTTGAG              | This study                |
| b-actin_qPCR_F                               | GATCATTGCTCCTCCTGAGC              | PMID_24524627             |
| b-actin_qPCR_R                               | AGTCCGCCTAGAAGCACTTG              | PMID_24524627             |

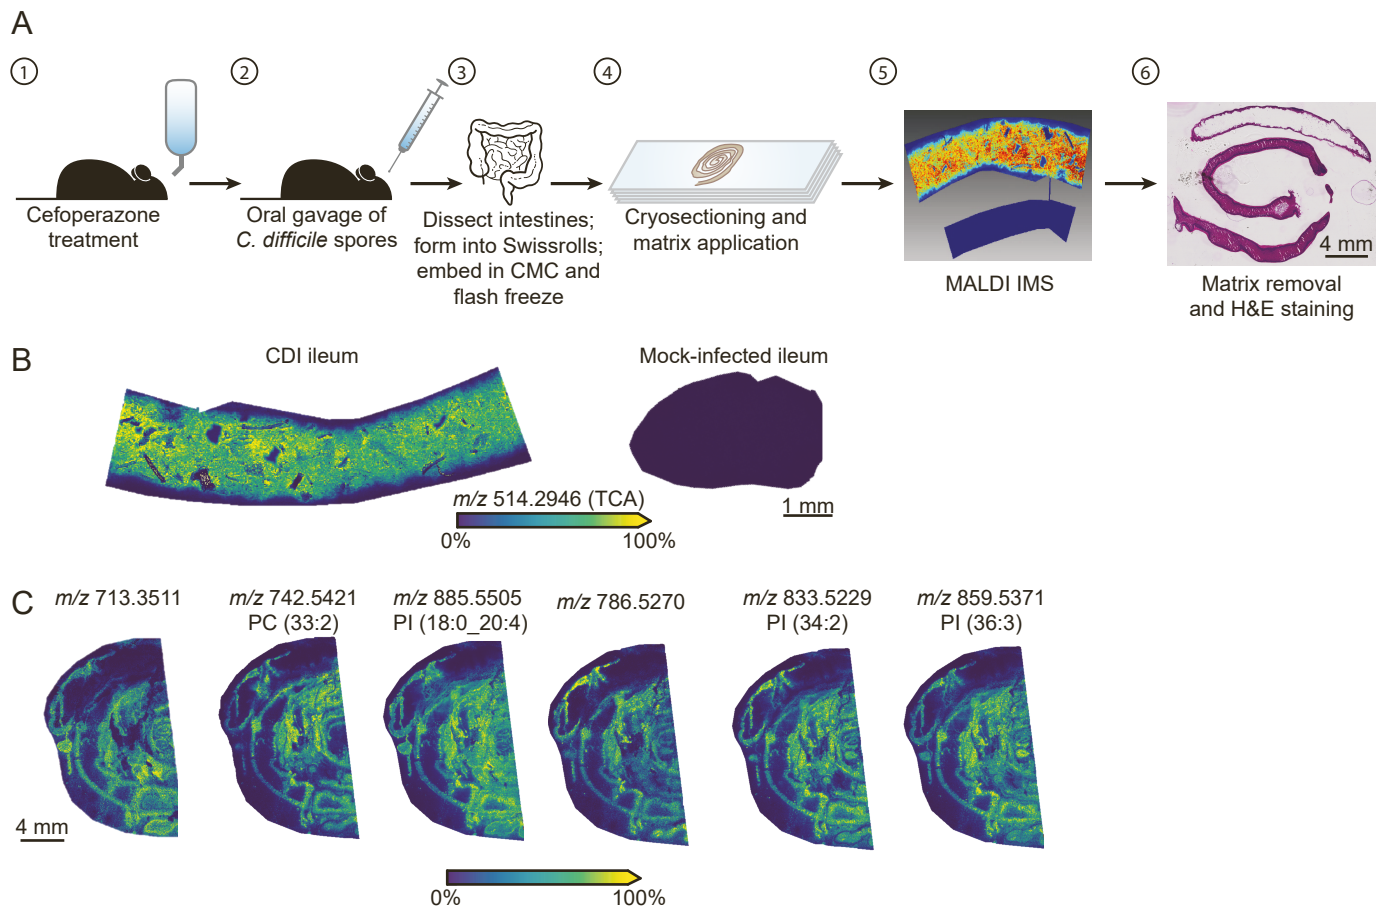

**Supplemental Figure 1. MALDI IMS efficiently ionizes a variety of species from the intestinal tract, including consistent intensity differences in TCA between infected and mock-infected samples. Related to Figure 1. (A)** Schematic showing key steps of our sample preparation method for subjecting fresh-frozen intestinal tissues and lumen in the Swissroll conformation to MALDI IMS and H&E staining. **(B)** TCA is consistently more highly present in the lumen of CDI tissue compared to mock-infected tissue. **(C)** The Swissroll conformation of intestinal tissue allows for the detection of a variety of lipid species with clear localization to the host epithelium

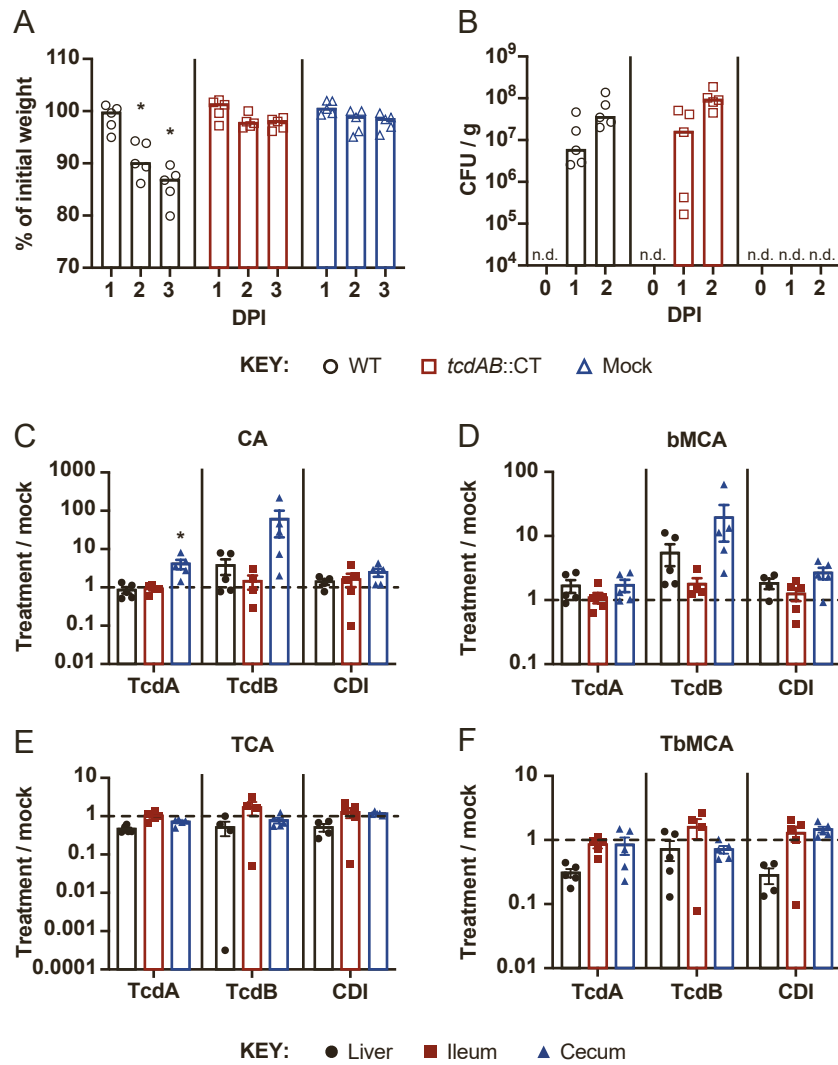

**Supplemental Figure 2. *C. difficile* toxins are required for full pathogenicity in mice, but are dispensable for colonization and are insufficient to induce a spike in bile acid levels. Related to Figure 2. (A)** Pathogenicity of indicated *C. difficile* strains determined as a function of percent of initial mouse weight at day 0. **(B)** Colonization levels of indicated strains as determined by CFU per gram of feces. Ratios of unconjugated **(C, D)** and taurine-conjugated **(E, F)** bile acids in the liver, ileum, and cecum of mice 8-hours after rectal infusion with 50  $\mu$ g TcdA or TcdB, or oral gavage with  $10^5$  wild-type *C. difficile* R20291 spores, relative to mice rectally infused with PBS. n.d., not detected; \* $P < 0.05$ , significance determined by unpaired two-sided t-tests;  $n = 5$  mice/group.

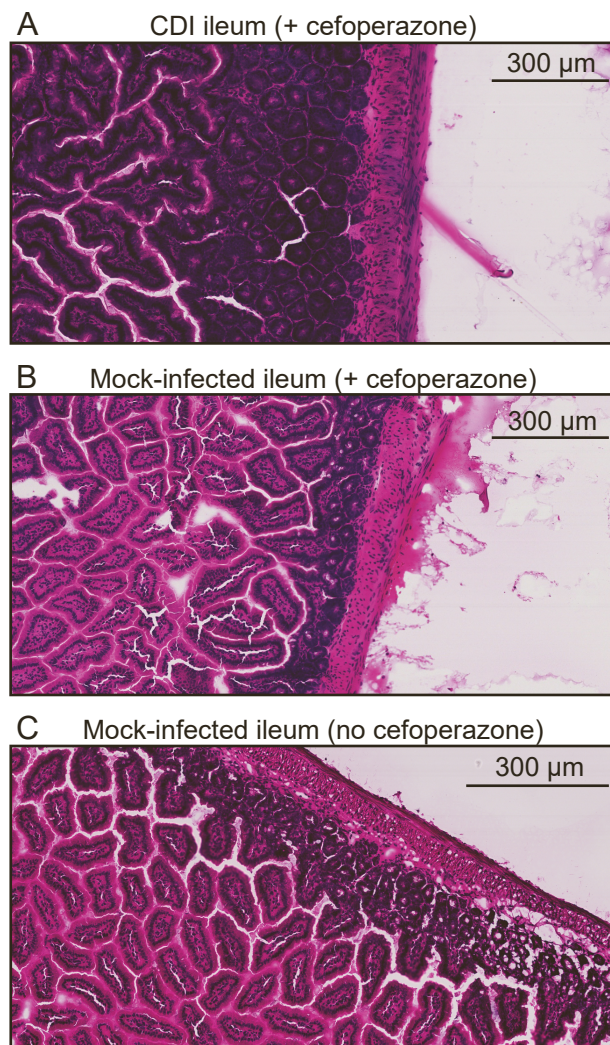

**Supplemental Figure 3. Histology reveals no signs of ileal inflammation in CDI mice. Related to Figure 2.** Histological analysis of H&E-stained intestinal tissues shows no significant inflammation or damage in either CDI (**A**) or mock-infected (**B**) mouse tissue at 3 DPI, and no signs of inflammation or tissue damage in non-antibiotic treated, mock-infected mouse tissue (**C**).

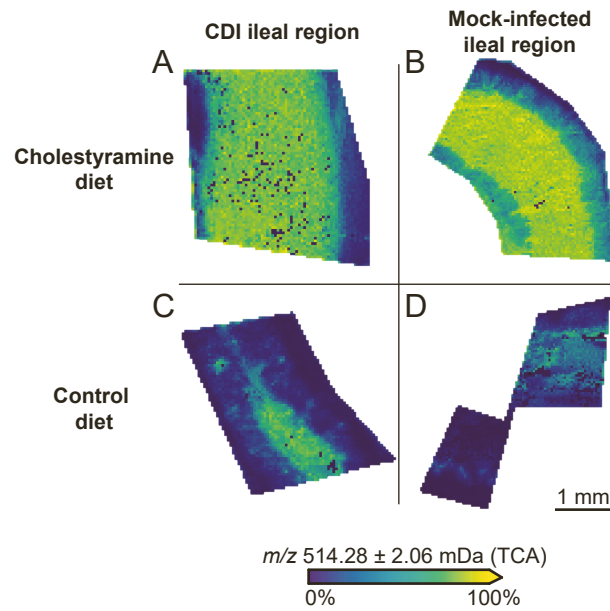

**Supplemental Figure 4. Cholestyramine increases the abundance of luminal TCA in the ilea of mock-infected mice. Related to Figure 4.** MALDI IMS reveals elevations in ileal lumen TCA abundance in CDI mice receiving a cholestyramine diet (**A**), mock-infected mice receiving a cholestyramine diet (**B**), and CDI mice receiving a control diet (**C**), relative to mock-infected mice receiving a control diet (**D**).
